# Supplementary material for: Learners with Low Working Memory Capacity Benefit More from the Presence of an Instructor’s Face in Video Lectures
Source: MDPI journal article supplement (doi:10.3390/jintelligence11010005), 2022-12-27
Supplement: s1 [file s1]

**Table S1.** Descriptives of 11 lecture videos.

| NO. | Topic                              | Area       | Video type | Familiarity <sup>a</sup> | Difficulty <sup>a</sup> | Familiarity <sup>b</sup> | Difficulty <sup>b</sup> |
|-----|------------------------------------|------------|------------|--------------------------|-------------------------|--------------------------|-------------------------|
| 1*  | Venus                              | science    | PV         | 3.21                     | 2.47                    | 2.29                     | 2.70                    |
| 2*  | Volcano                            | science    | VV         | 3.63                     | 2.47                    | 2.92                     | 2.65                    |
| 3   | Rosetta stone                      | history    | VV         | 1.37                     | 2.16                    | 1.38                     | 2.94                    |
| 4   | Medici                             | history    | PV         | 1.95                     | 2.05                    | 1.91                     | 2.18                    |
| 5   | Copper age                         | history    | AV         | 1.58                     | 2.63                    | 1.56                     | 2.59                    |
| 6   | The sound and the fury             | literature | PV         | 2.42                     | 2.26                    | 1.56                     | 3.06                    |
| 7   | Isabel Allende                     | literature | AV         | 1.42                     | 2.05                    | 1.58                     | 2.41                    |
| 8   | Malin Kundang <sup>c</sup>         | literature | VV         | 1.26                     | 1.58                    | 1.42                     | 2.00                    |
| 9   | Rhizanthella gardneri <sup>d</sup> | science    | PV         | 1.31                     | 2.15                    | 1.50                     | 2.56                    |
| 10  | Balinese tiger                     | science    | AV         | 1.95                     | 1.79                    | 1.76                     | 2.30                    |
| 11  | Permafrost                         | science    | VV         | 2.16                     | 2.42                    | 2.53                     | 2.67                    |

AV: the audio-video condition; PV: the picture-video condition; VV: the video-video condition; \* used as practice; <sup>a</sup> rated by 20 Chinese students who did not participate in the study; <sup>b</sup> rated by the 64 participants in the eye-tracking experiment; <sup>c</sup> a folk tale in Southeast Asia; <sup>d</sup> an entirely subterranean mycoheterotrophic orchid.
